# Supplementary material for: Adolescents’ Identity Formation: Linking the Narrative and the Dual-Cycle Approach
Source: PubMed Central journal article supplement (PMC7105420; doi:10.1007/s10964-019-01096-x), 2019-08-12
Supplement: 10964_2019_1096_MOESM1_ESM.pdf [file 10964_2019_1096_MOESM1_ESM.pdf]

*Online Resource by*  
**Adolescents' Identity Formation:**  
**Linking the Narrative and the Dual-Cycle Approach**

Lotte van Doeselaar, Kate C. McLean, Wim Meeus, Jaap J. A. Denissen, & Theo A. Klimstra  
*Journal of Youth and Adolescence*

Table S1

*Descriptive Statistics of the Commitment and Exploration Processes Across Groups of Adolescents Differing in Their Reason for not Writing a Turning Point Narrative (Study 1)*

|                     | Commitment making | Identification with commitment | Exploration in breadth | Exploration in depth | Ruminative exploration |
|---------------------|-------------------|--------------------------------|------------------------|----------------------|------------------------|
|                     | <i>M (SD)</i>     | <i>M (SD)</i>                  | <i>M (SD)</i>          | <i>M (SD)</i>        | <i>M (SD)</i>          |
| Wrote a narrative   | 3.39 (0.94)       | 3.58 (0.72)                    | 3.38 (0.73)            | 3.20 (0.73)          | 2.52 (0.79)            |
| No narrative        | 3.25 (1.03)       | 3.43 (0.88)                    | 3.11 (0.82)            | 2.85 (0.80)          | 2.26 (0.79)            |
| Don't want to share | 3.45 (1.12)       | 3.39 (0.97)                    | 3.30 (0.96)            | 3.08 (0.83)          | 2.29 (0.75)            |
| Don't know          | 3.24 (0.99)       | 3.47 (0.81)                    | 3.13 (0.73)            | 2.87 (0.75)          | 2.29 (0.80)            |
| No clear reason     | 3.25 (1.10)       | 3.38 (0.97)                    | 3.04 (0.92)            | 2.79 (0.87)          | 2.22 (0.80)            |

*Note.* From the adolescents who did not write a turning point narrative ( $n = 311$ , 16.4% of total sample), 16 stated that they did not want to share one, 184 stated that they could not think of a turning point event, and 111 did not provide a clear reason. Adolescents were not asked to provide a reason when they did not write a turning point narrative.

Table S2

*Descriptive Statistics for Adolescents in the Longitudinal Sample without a Turning Point Narrative at T1 and Comparisons with the Study 2 Sample (with a Turning Point Narrative at T1)*

|                                | T1            |          | T2            |          | T3            |          |
|--------------------------------|---------------|----------|---------------|----------|---------------|----------|
|                                | <i>M (SD)</i> | <i>d</i> | <i>M (SD)</i> | <i>d</i> | <i>M (SD)</i> | <i>d</i> |
| Commitment making              | 3.23 (1.13)   | .25      | 3.32 (1.24)   | .12      | 2.99 (0.89)   | .55*     |
| Identification with commitment | 3.46 (0.90)   | .23      | 3.31 (0.83)   | .40      | 3.27 (0.65)   | .41      |
| Exploration in breadth         | 3.15 (0.95)   | .32      | 3.27 (0.80)   | .48*     | 3.23 (0.58)   | .59*     |
| Exploration in depth           | 2.81 (0.68)   | .66**    | 3.04 (0.96)   | .43*     | 3.00 (0.71)   | .65**    |
| Ruminative exploration         | 2.42 (0.77)   | .14      | 2.84 (0.72)   | .17      | 2.97 (0.82)   | .17      |

*Note.* Differences between adolescents with (Study 2 sample) and without (descriptive statistics shown here) a turning point narrative at T1 in the five identity processes across time were tested with *t*-tests. For the comparisons at T1, T2, and T3 the *n* of adolescents without a turning point narrative at T1 was 28, 19, and 18, respectively. If significant, adolescents without a turning point narrative at T1 scored lower (see Table 3).

\*  $p < .05$ ; \*\*  $p < .01$ .

### Measurement Invariance

Longitudinal measurement invariance of the DIDS subscales was tested following steps described by Widaman, Ferrer, and Conger (2010). A series of longitudinal Confirmatory Factor Analysis (CFA) models was estimated in Mplus 7 (Muthén & Muthén, 1998-2015). Each dual-cycle process was tested separately. For reasons of slightly non-normally distributed variables, a Full Information Robust Maximum Likelihood estimator (MLR) was used (Satorra & Bentler, 2001). Model fit was considered to be acceptable when the Comparative Fit Index (CFI) was above 0.90 and the Root Mean Square Error of Approximation (RMSEA) was below 0.08 (Byrne, 2013). A significant reduction in model fit was concluded if two of the following three criteria were met:  $\Delta\chi^2_{SB}$  significant at  $< .050$ ,  $\Delta CFI < -.010$ , and  $\Delta RMSEA > .015$  (Chen, 2007; Cheung & Rensvold, 2002).

First, it was examined whether a longitudinal Confirmatory Factor Analysis (CFA) model fitted the data sufficiently (Widaman et al., 2010). A sufficient model fit would indicate configural invariance, which refers to the validity of the same CFA at every wave (Van de Schoot, Lugtig, & Hox, 2012). In addition to CFA models for one of the identity processes at all three waves, longitudinal CFA models contained covariances between the latent variables and between the residuals of like items across the waves. Only the model for exploration in breadth did not fit the data well,  $\chi^2_{SB}(72) = 421.88$ ,  $p < .001$ ,  $CFI = .68$ ,  $RMSEA = .14$ . The Modification Indices indicated that the residuals of the items “I am considering a number of different lifestyles that might suit me” and “I am thinking about different lifestyles that might be good for me” were correlated within every wave. Correlating the residuals of these items was deemed reasonable, as these items were more alike than others. Including these correlations resulted in an acceptable model fit for the model of exploration in breadth. The fit statistics of all models are displayed in Table S2.

Second, metric invariance was tested by constraining all factor loadings of like items to be equal across time. For none of the identity processes this resulted in a significantly worse model fit (see Table S2). Third, scalar invariance was tested by also constraining all intercepts of like items to be equal across time. Again, this did not result in a significantly worse model fit for any of the commitment and exploration processes (see Table S2). Moreover, all final models in which factor loadings and intercepts of like items were constrained to be equal across time had a sufficient model fit.

Lastly, it was checked whether constraining strict invariance would decrease the model fit by constraining the residuals of corresponding items to be time invariant. Adding these constraints did not significantly worsen the model fit for the model of commitment

making, identification with commitment, and ruminative exploration (see Table S2). However, the model fit for the model of exploration in breadth,  $\Delta\chi^2_{SB}(10) = 22.09, p = .015$ ,  $\Delta CFI = -.011$ ,  $\Delta RMSEA = .000$ , and exploration in depth,  $\Delta\chi^2_{SB}(10) = 25.09, p = .005$ ,  $\Delta CFI = -.021$ ,  $\Delta RMSEA = .007$ , became significantly worse. Next, it was checked for both models for which item constraining the residuals resulted in the biggest decrease in model fit, and subsequently which wave resulted in the biggest decrease in model fit. Based on these findings, a model was tested in which the residuals of four items were constrained across time and the residual of one item was constrained across two waves. The residual of this latter item was freely estimated at one wave. For exploration in breadth this was the item “I think about different goals that I might pursue” at T3. For exploration in depth this was the item “I think about whether the aims I already have for life really suit me” at T2. These models with partial strict invariance did not fit significantly worse than the models with scalar invariance (see Table S2).

Table S3

*Model Fit of Longitudinal CFA Models, Used to Test Longitudinal Measurement Invariance (Study 2)*

| Identity process               | Model                                 | Model fit     |           |          |      |       | Change in model fit <sup>a</sup> |           |          |              |                |
|--------------------------------|---------------------------------------|---------------|-----------|----------|------|-------|----------------------------------|-----------|----------|--------------|----------------|
|                                |                                       | $\chi^2_{SB}$ | <i>df</i> | <i>p</i> | CFI  | RMSEA | $\Delta\chi^2_{SB}$              | <i>df</i> | <i>p</i> | $\Delta$ CFI | $\Delta$ RMSEA |
| Commitment making              | 1. Configural invariance              | 103.40        | 72        | .009     | .982 | .042  |                                  |           |          |              |                |
|                                | 2. Metric invariance                  | 111.57        | 80        | .011     | .982 | .040  | 6.44                             | 8         | .598     | .000         | -.002          |
|                                | 3. Scalar invariance                  | 120.83        | 88        | .012     | .981 | .039  | 8.87                             | 8         | .353     | -.001        | -.001          |
|                                | 4. Strict invariance                  | 149.07        | 98        | .001     | .971 | .046  | 22.65                            | 10        | .012     | -.010        | .007           |
| Identification with commitment | 1. Configural invariance              | 179.78        | 72        | < .001   | .924 | .079  |                                  |           |          |              |                |
|                                | 2. Metric invariance                  | 192.24        | 80        | < .001   | .921 | .076  | 12.64                            | 8         | .125     | -.003        | -.003          |
|                                | 3. Scalar invariance                  | 202.49        | 88        | < .001   | .919 | .073  | 9.29                             | 8         | .318     | -.002        | -.003          |
|                                | 4. Strict invariance                  | 218.88        | 98        | < .001   | .915 | .071  | 16.69                            | 10        | .082     | -.004        | -.002          |
| Exploration in breadth         | 1. Configural invariance <sup>b</sup> | 155.27        | 69        | < .001   | .921 | .072  |                                  |           |          |              |                |
|                                | 2. Metric invariance                  | 163.16        | 77        | < .001   | .921 | .068  | 7.28                             | 8         | .507     | .000         | -.004          |
|                                | 3. Scalar invariance                  | 176.43        | 85        | < .001   | .916 | .067  | 12.87                            | 8         | .116     | -.005        | -.001          |
|                                | 4. Partial strict invariance          | 192.37        | 94        | < .001   | .910 | .066  | 16.30                            | 9         | .061     | -.006        | -.001          |
| Exploration in depth           | 1. Configural invariance              | 98.18         | 72        | .022     | .967 | .039  |                                  |           |          |              |                |
|                                | 2. Metric invariance                  | 102.48        | 80        | .046     | .972 | .034  | 4.75                             | 8         | .784     | .005         | -.005          |
|                                | 3. Scalar invariance                  | 117.45        | 88        | .020     | .963 | .037  | 15.61                            | 8         | .048     | -.009        | .003           |
|                                | 4. Partial strict invariance          | 132.74        | 97        | .009     | .955 | .039  | 14.96                            | 9         | .092     | -.008        | .002           |
| Ruminative exploration         | 1. Configural invariance              | 124.08        | 72        | < .001   | .937 | .055  |                                  |           |          |              |                |
|                                | 2. Metric invariance                  | 132.66        | 80        | < .001   | .937 | .052  | 7.48                             | 8         | .486     | .000         | -.003          |
|                                | 3. Scalar invariance                  | 140.31        | 88        | < .001   | .937 | .050  | 6.65                             | 8         | .575     | .000         | -.002          |
|                                | 4. Strict invariance                  | 153.47        | 98        | < .001   | .933 | .048  | 13.23                            | 10        | .211     | -.004        | -.002          |

*Note.* <sup>a</sup> The change in model fit refers to a comparison with the model in the previous line.

<sup>b</sup> The model of exploration in breadth included correlations between the residuals of two pairs of items within every wave, as described in the text.

Table S4

*Comparisons between Adolescents With and Without a Self-event Connection at T1 in the Commitment and Exploration Processes Across the Three Waves (Study 2)*

| Self-event connection T1:      | DIDS T1       |               |          | DIDS T2       |               |          | DIDS T3       |               |          |
|--------------------------------|---------------|---------------|----------|---------------|---------------|----------|---------------|---------------|----------|
|                                | Yes           | No            | <i>d</i> | Yes           | No            | <i>d</i> | Yes           | No            | <i>d</i> |
|                                | <i>M (SD)</i> | <i>M (SD)</i> |          | <i>M (SD)</i> | <i>M (SD)</i> |          | <i>M (SD)</i> | <i>M (SD)</i> |          |
| Commitment making              | 3.46 (0.90)   | 3.51 (0.88)   | .06      | 3.38 (1.03)   | 3.54 (0.94)   | .16      | 3.55 (1.00)   | 3.43 (0.94)   | .11      |
| Identification with commitment | 3.61 (0.74)   | 3.70 (0.71)   | .13      | 3.60 (0.71)   | 3.65 (0.76)   | .06      | 3.56 (0.79)   | 3.55 (0.71)   | .01      |
| Exploration in breadth         | 3.48 (0.72)   | 3.34 (0.81)   | .19      | 3.67 (0.71)   | 3.59 (0.74)   | .11      | 3.60 (0.70)   | 3.62 (0.66)   | .03      |
| Exploration in depth           | 3.29 (0.72)   | 3.24 (0.65)   | .07      | 3.45 (0.72)   | 3.36 (0.75)   | .12      | 3.49 (0.75)   | 3.42 (0.61)   | .10      |
| Ruminative exploration         | 2.60 (0.76)   | 2.43 (0.77)   | .23      | 2.77 (0.78)   | 2.64 (0.82)   | .15      | 2.77 (0.94)   | 2.88 (0.92)   | .11      |

*Note.* DIDS = Dimensions of Identity Development Scale. Differences between the two groups were tested with *t*-tests, but were not significant,  $p \geq .079$ .

Table S5

*Correlations between Agency at T1 and the Commitment and Exploration Processes across the Three Waves (Study 2)*

|                                | Agency T1 |         |         |
|--------------------------------|-----------|---------|---------|
|                                | DIDS T1   | DIDS T2 | DIDS T3 |
| Commitment making              | .00       | .04     | .13     |
| Identification with commitment | .02       | .06     | .15*    |
| Exploration in breadth         | .01       | .13     | .13     |
| Exploration in depth           | .10       | .19*    | .19*    |
| Ruminative exploration         | .01       | .02     | .00     |

*Note.* DIDS = Dimensions of Identity Development Scale.

\*  $p < .05$

Table S6

*Results of the Latent Growth Curve Model with Self-event Connection as Predictor of the Dual-Cycle Processes' Growth Factors (Study 2)*

| Independent var.    | Intercepts        |      |     |      |                                |      |     |      |                        |      |     |      |                      |      |     |     |                        |      |     |      |
|---------------------|-------------------|------|-----|------|--------------------------------|------|-----|------|------------------------|------|-----|------|----------------------|------|-----|-----|------------------------|------|-----|------|
|                     | Commitment making |      |     |      | Identification with commitment |      |     |      | Exploration in breadth |      |     |      | Exploration in depth |      |     |     | Ruminative exploration |      |     |      |
|                     | b                 | p    | SE  | β    | b                              | p    | SE  | β    | b                      | p    | SE  | β    | b                    | p    | SE  | β   | b                      | p    | SE  | β    |
| Self-event connect. | -.06              | .592 | .12 | -.04 | -.09                           | .365 | .09 | -.06 | .15                    | .138 | .10 | .11  | .05                  | .554 | .09 | .05 | .18                    | .069 | .10 | .14  |
| Independent var.    | Slopes            |      |     |      |                                |      |     |      |                        |      |     |      |                      |      |     |     |                        |      |     |      |
|                     | Commitment making |      |     |      | Identification with commitment |      |     |      | Exploration in breadth |      |     |      | Exploration in depth |      |     |     | Ruminative exploration |      |     |      |
|                     | b                 | p    | SE  | β    | b                              | p    | SE  | β    | b                      | p    | SE  | β    | b                    | p    | SE  | β   | b                      | p    | SE  | β    |
| Self-event connect. | .00               | .991 | .06 | .00  | -.01                           | .899 | .05 | -.01 | -.04                   | .349 | .05 | -.08 | .01                  | .769 | .05 | .02 | -.05                   | .357 | .06 | -.08 |

Table S7

*Results of the Latent Growth Curve Model with Agency as Predictor of the Dual-Cycle Processes' Growth Factors (Study 2)*

| Independent var. | Intercepts        |      |     |      |                                |      |     |     |                        |      |     |     |                      |      |     |     |                        |      |     |      |
|------------------|-------------------|------|-----|------|--------------------------------|------|-----|-----|------------------------|------|-----|-----|----------------------|------|-----|-----|------------------------|------|-----|------|
|                  | Commitment making |      |     |      | Identification with commitment |      |     |     | Exploration in breadth |      |     |     | Exploration in depth |      |     |     | Ruminative exploration |      |     |      |
|                  | b                 | p    | SE  | β    | b                              | p    | SE  | β   | b                      | p    | SE  | β   | b                    | p    | SE  | β   | b                      | p    | SE  | β    |
| Agency           | -.01              | .930 | .06 | -.01 | .01                            | .897 | .05 | .01 | .01                    | .861 | .05 | .01 | .08                  | .195 | .06 | .13 | .01                    | .877 | .05 | .01  |
| Independent var. | Slopes            |      |     |      |                                |      |     |     |                        |      |     |     |                      |      |     |     |                        |      |     |      |
|                  | Commitment making |      |     |      | Identification with commitment |      |     |     | Exploration in breadth |      |     |     | Exploration in depth |      |     |     | Ruminative exploration |      |     |      |
|                  | b                 | p    | SE  | β    | b                              | p    | SE  | β   | b                      | p    | SE  | β   | b                    | p    | SE  | β   | b                      | p    | SE  | β    |
| Agency           | .07               | .056 | .04 | .15  | .06                            | .022 | .03 | .14 | .06                    | .027 | .03 | .19 | .06                  | .009 | .02 | .19 | -.01                   | .772 | .04 | -.03 |

## References

- Byrne, B. M. (2013). *Structural equation modeling with Mplus: Basic concepts, applications, and programming*. New York, NY: Routledge.
- Chen, F. F. (2007). Sensitivity of goodness of fit indexes to lack of measurement invariance. *Structural Equation Modeling: A Multidisciplinary Journal*, 14, 464-504.  
doi:10.1080/10705510701301834
- Cheung, G. W., & Rensvold, R. B. (2002). Evaluating goodness-of-fit indexes for testing measurement invariance. *Structural Equation Modeling: A Multidisciplinary Journal*, 9, 233-255. doi:10.1207/S15328007SEM0902\_5
- Muthén, L. K., & Muthén, B. O. (1998-2015). *Mplus user's guide* (7th ed.). Los Angeles, CA: Author.
- Satorra, A., & Bentler, P. M. (2001). A scaled difference chi-square test statistic for moment structure analysis. *Psychometrika*, 66, 507-514. doi:10.1007/BF02296192
- Van de Schoot, R., Lugtig, P., & Hox, J. (2012). A checklist for testing measurement invariance. *European Journal of Developmental Psychology*, 9, 486-492.  
doi:10.1080/17405629.2012.686740
- Widaman, K. F., Ferrer, E., & Conger, R. D. (2010). Factorial invariance within longitudinal structural equation models: Measuring the same construct across time. *Child Development Perspectives*, 4, 10-18. doi:10.1111/j.1750-8606.2009.00110.x
